# Supplementary material for: Nutrient Supply Is Essential for Shifting Tree Peony Reflowering Ahead in Autumn and Sugar Signaling Is Involved
Source: MDPI journal article supplement (doi:10.3390/ijms23147703), 2022-07-12
Supplement: s1 [file s1]

**Table S1.** Statistical analysis of bud development and flowering

| Treatments   | Bud diameter<br>(mm) | New branch length<br>(cm) | Max leaf length<br>(cm) | Flowering<br>rate (%) | Initial flowering<br>time |
|--------------|----------------------|---------------------------|-------------------------|-----------------------|---------------------------|
| Control      | 20.40±0.15 a         | 19.93±0.34 b              | 15.43±0.69 b            | 81.86 a               | October 8 <sup>th</sup>   |
| GA treatment | 9.92±0.21 c          | 33.10±0.78 a              | 18.80±3.70 ab           | 0.00 c                | n/a                       |
| GA+Nutrient  | 14.64±0.52 b         | 31.71±0.33 a              | 20.56±1.08 a            | 62.57 b               | August 29 <sup>th</sup>   |

Note: error bars indicate the standard deviation (n = 5), and different lowercase letters indicate significant differences (Tukey's test,  $\alpha = 0.05$ ). n/a, not apply.

**Table S2.** Effect of various fertilizers on reflowering of tree peony in autumn

| Fertilizer type | The ratio of<br>N, P, K | Flower diameter<br>(cm) | New branch length<br>(cm) | Initial flowering<br>period |
|-----------------|-------------------------|-------------------------|---------------------------|-----------------------------|
| Control         | 0:0:0                   | 12.83±1.19b             | 22.32±1.59a               | Sep. 23, 2019               |
| Type I          | 1:1:1                   | 15.86±1.27a             | 23.41±2.47a               | Sep. 22, 2019               |
| Type II         | 1:3:2                   | 15.58±1.41a             | 22.77±1.75a               | Sep. 19, 2019               |
| Type III        | 3:2:6                   | 15.34±1.13a             | 23.18±1.66a               | Sep. 23, 2019               |

**Table S3.** The primer sequence information used for gene expression in this study

| Gene name       | Primer name | Sequence (5'-3')         | Gene ID        |
|-----------------|-------------|--------------------------|----------------|
| <i>PsAPI</i>    | RTAP1-F     | AGAAGAAGGAAAGGGCAATC     | KF113361.1     |
|                 | RTAP1-R     | TTCCTCCTCACTTCTGTTGG     |                |
| <i>PsFT</i>     | RTFT-F      | CCAAGCGACCCAAACCTA       | KF113360.1     |
|                 | RTFT-R      | CGCCAACCTGGAGTGTA        |                |
| <i>PsLFY</i>    | RTLTY-F     | ATGAGAAGGAAGGAGGGGATG    | psu.G.00032564 |
|                 | RTLTY-R     | CTTTGGCAATGGTCTGAACT     |                |
| <i>PsSOC1</i>   | RTSOC1-F    | CCAATGTCCGAGCAAGAAAG     | KR779924.1     |
|                 | RTSOC1-R    | CCGTGCTTCTCGCATAACAT     |                |
| <i>PsSVP</i>    | RTSVP-F     | CGATGTTGAGCAAGGAGGTT     | KC847164.1     |
|                 | RTSVP-R     | GCTCTAAATCAGCAGCGACA     |                |
| <i>PsGA20ox</i> | RTGA20ox-F  | TGGGTGGTCTTCAAGTGT       | MH546118.1     |
|                 | RTGA20ox-R  | AGCCCTGTAAATGTTTCTGTG    |                |
| <i>PsGA3ox</i>  | RTGA3ox-F   | TGATGTGGTTGATGTTGGGCT    | MH546120.1     |
|                 | RTGA3ox-R   | GAGAAGAGTTGAATCTGTGTGTGC |                |
| <i>PsGA2ox</i>  | RTGA2ox-F   | CTCCAAACCCGACACTAAACA    | MH546119       |
|                 | RTGA2ox-R   | GCCCAATGTTCTTGTTCCTCA    |                |
| <i>PsGID1c</i>  | RTGID1c-F   | TGAAGAACCTCCACCAAG       | MH546122       |
|                 | RTGID1c-R   | CCACAAGACGACGACAAA       |                |
| <i>PsGAI</i>    | RTGAI-F     | GAGTATGCTGTCCGAGTTCA     | MH550803       |
|                 | RTGAI-R     | CAGGAGCAAGGAACGAAT       |                |
| <i>PsHXK1</i>   | RTHXK1-F    | ATAAGAAAAGCCGTGGTAGAGC   | MT136704       |
|                 | RTHXK1-R    | AGTGTTTCATACAAGCCACCATC  |                |
| <i>PsSnRK1</i>  | RTSnRK1-F   | CACGAAGGAATGGCGAATA      | MT136703       |
|                 | RTSnRK1-R   | CAAGGAAGGCAGCACAAAG      |                |
| <i>PsTPS1</i>   | RTTPS1-F    | CTCTCGACTTCCATGCCTTA     | MT136702       |
|                 | RTTPS1-R    | CTGTGATGTTCCAAGGGTTC     |                |
| <i>Actin</i>    | Actin-F     | GAGAGATTCCGTTGCCAG       | JN105298       |
|                 | Actin-R     | TCCTTGCTCATTCTGTCTGC     |                |

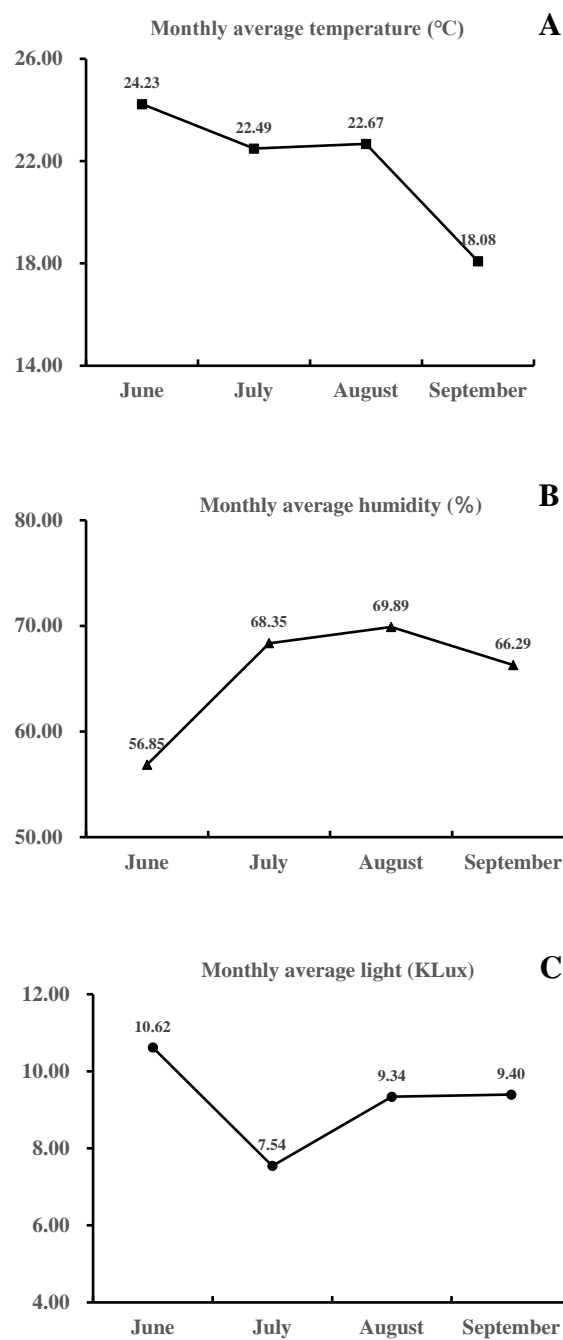

**Figure S1.** Environmental conditions in the process of tree peony 'Qiu Fa No. 1' bud growth and development. A: Monthly average temperature; B: Monthly average humidity; C: Monthly average light.
